# Supplementary material for: Circulating Tumour DNA as Biomarker for Colorectal Liver Metastases: A Systematic Review and Meta-Analysis
Source: MDPI journal article supplement (doi:10.3390/cells12212520), 2023-10-25

### Supplementary File S1 – Search terms

The following search was performed on the 26th of May 2023:

#### **Embase**

('colorectal liver metastasis'/de OR (('metastatic colorectal cancer'/exp OR 'colorectal cancer'/exp) AND ('liver metastasis'/de OR 'hepatectomy'/exp)) OR ( ((colorect\* OR colo-rect\* OR rect\* OR colon\*) NEAR/6 (liver\* OR hepat\*) NEAR/6 (metastas\*)) OR ( ( ((metastat\*) NEAR/6 (colorect\* OR rect\* OR colo\*) NEAR/6 (canc\* OR carcinom\* OR tumor\* OR tumour\* OR neoplas\* OR adenocarcinom\* OR resect\* OR unresect\* OR excision\*)) OR ((colorect\* OR colo-rect\* OR rect\* OR colon\*) NEAR/6 (metastas\* OR cancer\* OR tumour\* OR tumor\* OR neoplas\* OR carcinom\* OR adenocarcinom\* OR resect\* OR unresect\* OR excision\*)) ) AND (((liver OR hepat\*) NEAR/6 metastas\*) OR hepatect\* OR ((liver\* OR hepat\*) NEAR/6 (resect\* OR excis\*)) ) ):ab,ti,kw) **AND** ('circulating tumor DNA'/de OR 'DNA determination'/mj/de OR 'circulating free DNA'/de OR 'liquid biopsy'/de OR 'circulating tumor cell'/de OR (((free\* OR circulat\*) NEAR/3 (DNA\*)) OR ctDNA\* OR ct-DNA\* OR cfDNA OR cf-DNA\* OR ((liquid\*) NEAR/3 (biops\*)) OR ((circulat\*) NEAR/3 (tumor\* OR tumour\* OR cancer\* OR neoplas\*)) OR CTC OR CTCs):ab,ti,kw) NOT ([Conference Abstract]/lim OR [Conference Review]/lim) AND [ENGLISH]/lim NOT ('case report'/de OR (case-report):ti) NOT ([animals]/lim NOT [humans]/lim)

#### **Medline**

((exp Colorectal Neoplasms/) AND ((exp Liver Neoplasms/ AND exp Neoplasm Metastasis/) OR Hepatectomy/)) OR ( ((colorect\* OR colo-rect\* OR rect\* OR colon\*) ADJ6 (liver\* OR hepat\*) ADJ6 (metastas\*)) OR ( ( ((metastat\*) ADJ6 (colorect\* OR rect\* OR colo\*) ADJ6 (canc\* OR carcinom\* OR tumor\* OR tumour\* OR neoplas\* OR adenocarcinom\* OR resect\* OR unresect\* OR excision\*)) OR ((colorect\* OR colo-rect\* OR rect\* OR colon\*) ADJ6 (metastas\* OR cancer\* OR tumour\* OR tumor\* OR neoplas\* OR carcinom\* OR adenocarcinom\* OR resect\* OR unresect\* OR excision\*)) ) AND (((liver OR hepat\*) ADJ6 metastas\*) OR hepatect\* OR ((liver\* OR hepat\*) ADJ6 (resect\* OR excis\*)) ) ).ab,ti,kf.) **AND** (Circulating Tumor DNA/ OR \*Sequence Analysis, DNA/ OR Cell-Free Nucleic Acids/ OR Liquid Biopsy/ OR Neoplastic Cells, Circulating/ OR (((free\* OR circulat\*) ADJ3 (DNA\*)) OR ctDNA\* OR ct-DNA\* OR cfDNA OR cf-DNA\* OR ((liquid\*) ADJ3 (biops\*)) OR ((circulat\*) ADJ3 (tumor\* OR tumour\* OR cancer\* OR neoplas\*)) OR CTC OR CTCs).ab,ti,kf.) NOT (news OR congres\* OR abstract\* OR book\* OR chapter\* OR dissertation abstract\*).pt. AND (english).lg NOT (Case Reports/ OR (case-report).ti.) NOT (exp animals/ NOT humans/)

#### **Cochrane (Ovid=same)**

(( ((colorect\* OR colo NEXT rect\* OR rect\* OR colon\*) NEAR/6 (liver\* OR hepat\*) NEAR/6 (metastas\*)) OR ( ( ((metastat\*) NEAR/6 (colorect\* OR rect\* OR colo\*) NEAR/6 (canc\* OR carcinom\* OR tumor\* OR tumour\* OR neoplas\* OR adenocarcinom\* OR resect\* OR unresect\* OR excision\*)) OR ((colorect\* OR colo NEXT rect\* OR rect\* OR colon\*) NEAR/6 (metastas\* OR cancer\* OR tumour\* OR tumor\* OR neoplas\* OR carcinom\* OR adenocarcinom\* OR resect\* OR unresect\* OR excision\*)) ) AND (((liver OR

hepat\*) NEAR/6 metastas\*) OR hepatect\* OR ((liver\* OR hepat\*) NEAR/6 (resect\* OR excis\*)) ) :ab,ti  
**AND** ( (((free\* OR circulat\*) NEAR/3 (DNA\*)) OR ctDNA\* OR ct NEXT DNA\* OR cfDNA OR cf NEXT DNA\*  
 OR ((liquid\*) NEAR/3 (biops\*)) OR ((circulat\*) NEAR/3 (tumor\* OR tumour\* OR cancer\* OR neoplas\*))  
 OR CTC OR CTCs):ab,ti) NOT "conference abstract":pt

## Web of Science

TS=((( ((colorect\* OR colo-rect\* OR rect\* OR colon\*) NEAR/5 (liver\* OR hepat\*) NEAR/5 (metastas\*))  
 OR ( ( ((metatstat\*) NEAR/5 (colorect\* OR rect\* OR colo\*) NEAR/5 (canc\* OR carcinom\* OR tumor\* OR  
 tumour\* OR neoplas\* OR adenocarcinom\* OR resect\* OR unresect\* OR excision\*)) OR ((colorect\* OR  
 colo-rect\* OR rect\* OR colon\*) NEAR/5 (metastas\* OR cancer\* OR tumour\* OR tumor\* OR neoplas\* OR  
 carcinom\* OR adenocarcinom\* OR resect\* OR unresect\* OR excision\*)) ) ) **AND** ( (((free\*  
 OR circulat\*) NEAR/2 (DNA\*)) OR ctDNA\* OR ct-DNA\* OR cfDNA OR cf-DNA\* OR ((liquid\*) NEAR/2  
 (biops\*)) OR ((circulat\*) NEAR/2 (tumor\* OR tumour\* OR cancer\* OR neoplas\*)) OR CTC OR CTCs)) NOT  
 ((animal\* OR rat OR rats OR mouse OR mice OR murine OR dog OR dogs OR canine OR cat OR cats OR  
 feline OR rabbit OR cow OR cows OR bovine OR rodent\* OR sheep OR ovine OR pig OR swine OR porcine  
 OR veterinar\* OR chick\* OR zebrafish\* OR baboon\* OR nonhuman\* OR primate\* OR cattle\* OR goose  
 OR geese OR duck OR macaque\* OR avian\* OR bird\* OR fish\*) NOT (human\* OR patient\* OR women OR  
 woman OR men OR man))) AND LA=(English) NOT DT=(Meeting Abstract OR Meeting Summary) NOT  
 TI=(case-report)

## Google Scholar

"colorectal|rectal|colon liver|hepatic metastasis|metastases" "circulating|ct|cf DNA"|"cell free  
 DNA"|ctDNA|cfDNA|"circulating tumor|tumour DNA|cell"|"cell free tumor|tumour DNA"|"liquid  
 biopsy"

'colorectal|rectal|colon liver|hepatic metastasis|metastases' 'circulating|ct|cf DNA'|'cell free  
 DNA'|ctDNA|cfDNA|'circulating tumor|tumour DNA|cell'|'cell free tumor|tumour DNA'|'liquid biopsy'

Table S1 – *Quality Assessment QUIPS tool*

|                  | Risk of bias domains |    |    |    |    |    | Overall |
|------------------|----------------------|----|----|----|----|----|---------|
|                  | D1                   | D2 | D3 | D4 | D5 | D6 |         |
| Newhook et al.   | +                    | +  | +  | +  | -  | +  | +       |
| Nishioka et al.  | +                    | X  | +  | +  | -  | +  | -       |
| Ogaard et al.    | +                    | -  | +  | +  | -  | +  | -       |
| Bolhuis et al.   | +                    | -  | +  | +  | -  | -  | -       |
| Kobayashi et al. | -                    | X  | +  | +  | X  | -  | X       |
| Tie et al.       | +                    | +  | +  | +  | -  | +  | +       |
| Wang et al.      | +                    | X  | +  | +  | +  | +  | +       |
| He et al.        | -                    | -  | +  | +  | -  | -  | X       |
| Polivka et al.   | X                    | X  | -  | -  | X  | X  | X       |
| Bidard et al.    | -                    | +  | +  | +  | -  | +  | -       |
| Narayan et al.   | +                    | +  | +  | -  | X  | -  | -       |

Study

Domains:  
D1: Bias due to participation.  
D2: Bias due to attrition.  
D3: Bias due to prognostic factor measurement.  
D4: Bias due to outcome measurement.  
D5: Bias due to confounding.  
D6: Bias in statistical analysis and reporting.

Judgement  
X High  
- Moderate  
+ Low

Table S2 – *Reasons of bias QUIPS tool*

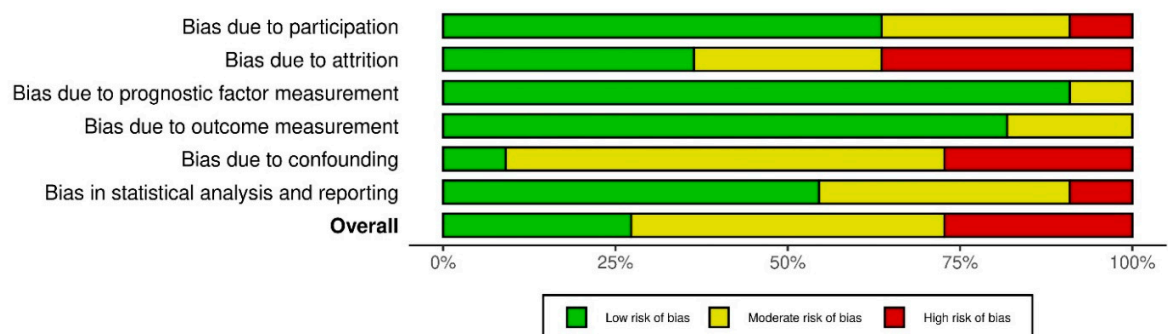

Table S3 – *ctDNA measurement techniques (next page)*

| <b>Author,<br/>year</b>                           | <b>NGS/PCR</b> | <b>Target / assay</b>                                           | <b>Tumour-<br/>informed/agnostic</b>            | <b>Tube type</b>                | <b>Plasma isolation</b>                                            | <b>cfDNA<br/>isolation</b>    | <b>plasma<br/>volume</b>   | <b>interval btw<br/>surgery and<br/>postop sample</b> | <b>Risk of<br/>Bias</b> |
|---------------------------------------------------|----------------|-----------------------------------------------------------------|-------------------------------------------------|---------------------------------|--------------------------------------------------------------------|-------------------------------|----------------------------|-------------------------------------------------------|-------------------------|
| <i>Newhook et al. 2022 [20] (U.S.A.)</i>          | NGS            | Guardant variant classifier (23 genes)                          | Tumour-agnostic; for 38 pt Tumour-informed      | EDTA                            | dual centrifugation directly following blood draw                  | unknown                       | 5ml blood > ~2 ml plasma   | 18 days (IQR 13-68)                                   | Low                     |
| <i>Nishioka et al. 2022 [28] (U.S.A.)</i>         | NGS            | NGS panel of 70 cancer-related genes + part with Guardant assay | Tumour-agnostic                                 | unknown                         | unknown                                                            | unknown                       | unknown                    | Within 180 days                                       | Moderate                |
| <i>Ogaard et al. 2022 [17] (Denmark)</i>          | ddPCR          | Methylation profile                                             | Tumour-agnostic                                 | K2-EDTA                         | 10 min at 3,000g within 2 hrs, plasma 10 min at 3,000g, room temp  | qiaAMP                        | 8 mL                       | Within 90 days                                        | Moderate                |
| <i>Bolhuis et al. 2021 [25] (The Netherlands)</i> | ddPCR          | KRAS and NRAS mutational status                                 | Tumour-informed (specific gene mutation status) | cell-stabilising BCT tube       | 1,700 g for 10 min, 20,000 g 10 min                                | QIAasymplicity                | 10 ml blood > ~4 ml plasma | After 3 months (maximally 100 days)                   | Moderate                |
| <i>Kobayashi et al. 2021 [21] (Japan)</i>         | NGS            | Guardant360®                                                    | Tumour-agnostic                                 | unknown                         | unknown                                                            | qiaAMP                        | 2 ml                       | No post-surgery sample                                | High                    |
| <i>Tie et al. 2021 [27] (Australia)</i>           | NGS            | Patient personalised assay                                      | Tumour-informed (patient specific)              | EDTA                            | centrifuged twice at 1,200g and 1,800g; speed unknown              | qiaAMP                        | 10 ml                      | 4-10 weeks                                            | Low                     |
| <i>Wang et al. 2021 [24] (China)</i>              | NGS            | ctDNA 451-gene NGS panel                                        | Tumour-agnostic                                 | K2-EDTA                         | 1,600 g for 10 min, 10,000 g for 10 min; speed unknown             | qiaAMP                        | 3-3.5 ml                   | Median time of 38 days after surgery                  | Low                     |
| <i>He et al. 2020 [22] (China)</i>                | NGS            | Coloncore panel                                                 | Tumour-agnostic                                 | STRECK                          | 2400 g for 10 min and plasma at 16000xg for 5 min                  | qiaAMP                        | 10ml blood > ~4ml plasma   | Within 7 days                                         | High                    |
| <i>Polivka et al. 2020 [29] (Czech Republic)</i>  | ddPCR          | KRAS mutational status                                          | Tumour-informed (specific gene mutation status) | K3-EDTA                         | 950 rcf at 10 min at 4 °C and then at 11,000 rcf at 10 min at 4 °C | qiaAMP                        | 1 ml                       | 1 day                                                 | High                    |
| <i>Bidard et al. 2019 [26] (France)</i>           | ddPCR          | KRAS exon 2 mutational status                                   | Tumour-informed (specific gene mutation status) | CellSave®                       | 10 min at 820 g within 3 hrs, 16,000 g for 10 min at 15 °C         | qiaAMP                        | 4 ml                       | No post-surgery sample                                | Moderate                |
| <i>Narayan et al. 2019 [23] (U.S.A.)</i>          | NGS and PCR    | TP53 and APC mutational status                                  | Tumour-informed (specific gene mutation status) | Cell-Free DNA BCT tube (STRECK) | according to reference only 1 centrifugation step                  | according to reference qiaAMP | unknown                    | 3-4 weeks                                             | Moderate                |

ctDNA: circulating tumour DNA, NSG: next generation sequencing, ddPCR: digital droplet PCR, PCR: polymerase chain reaction

Figure S1 – Sample timing, ctDNA detection rate and perioperative treatment per study. Blood sample tubes were used to illustrate when sampling took place. Additionally, when ctDNA positivity rates were provided by the authors, these were included in yellow. Neoadjuvant and adjuvant treatment is illustrated by the green bars, including the amount of patients receiving the treatment.

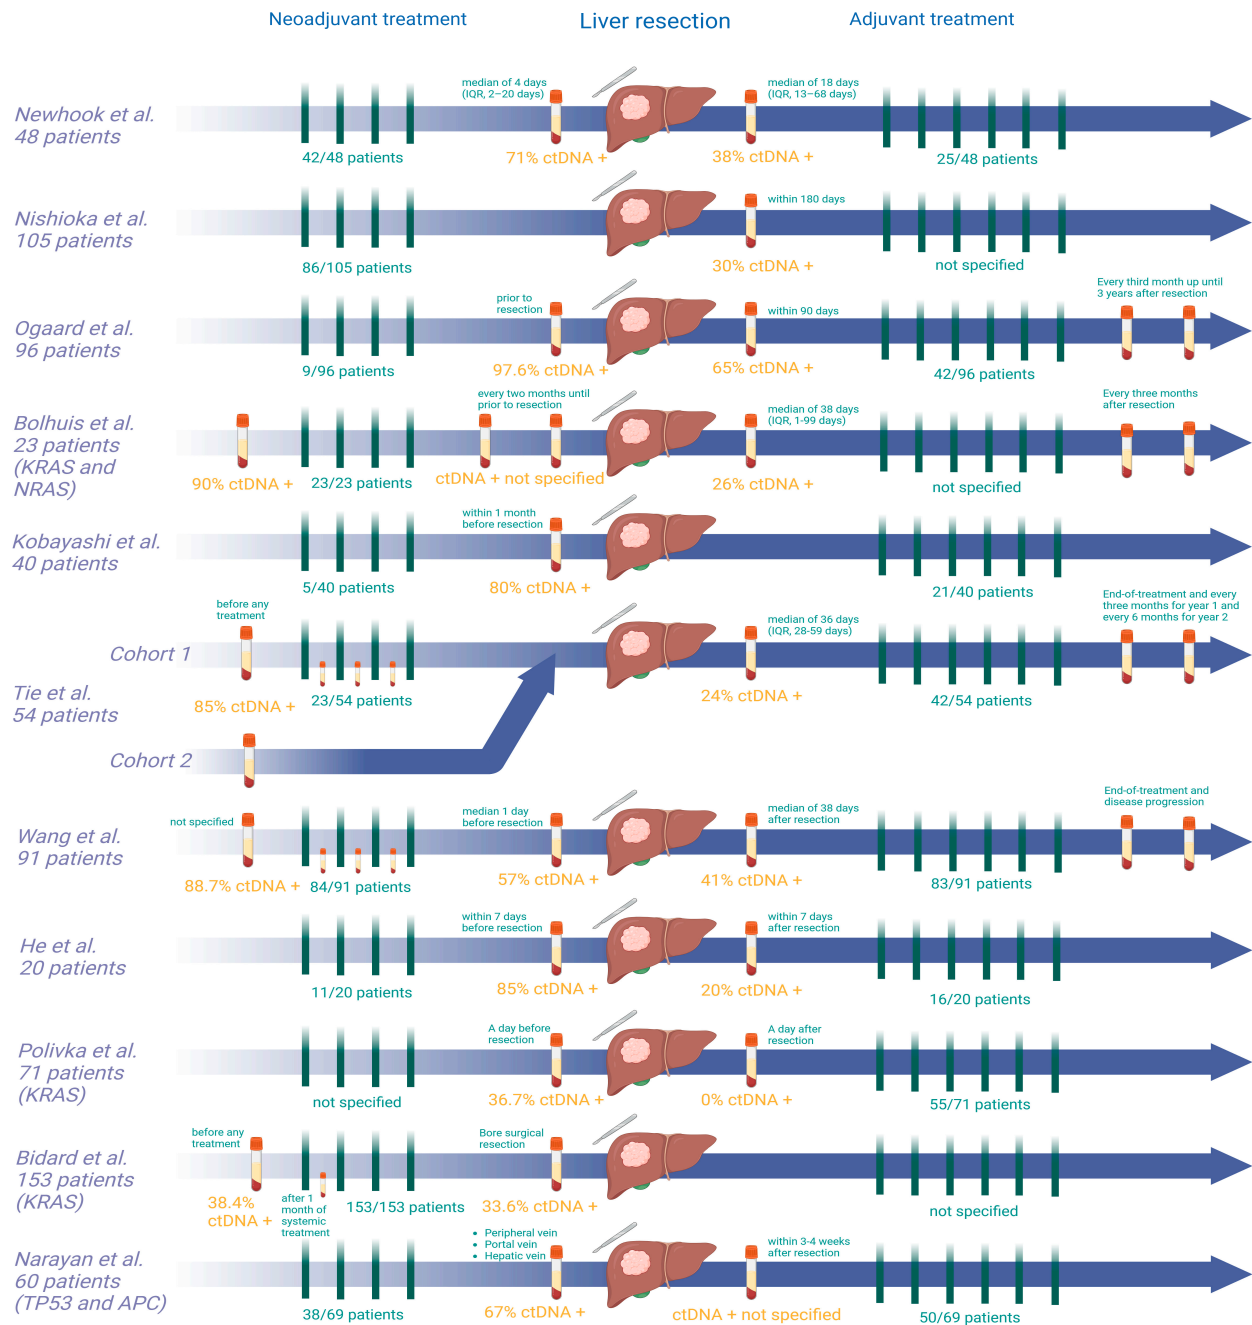

Figure S2 – Funnel plots. (Abbreviations: RFS, Recurrence-free Survival; OS, Overall Survival; SE, Standard Error)

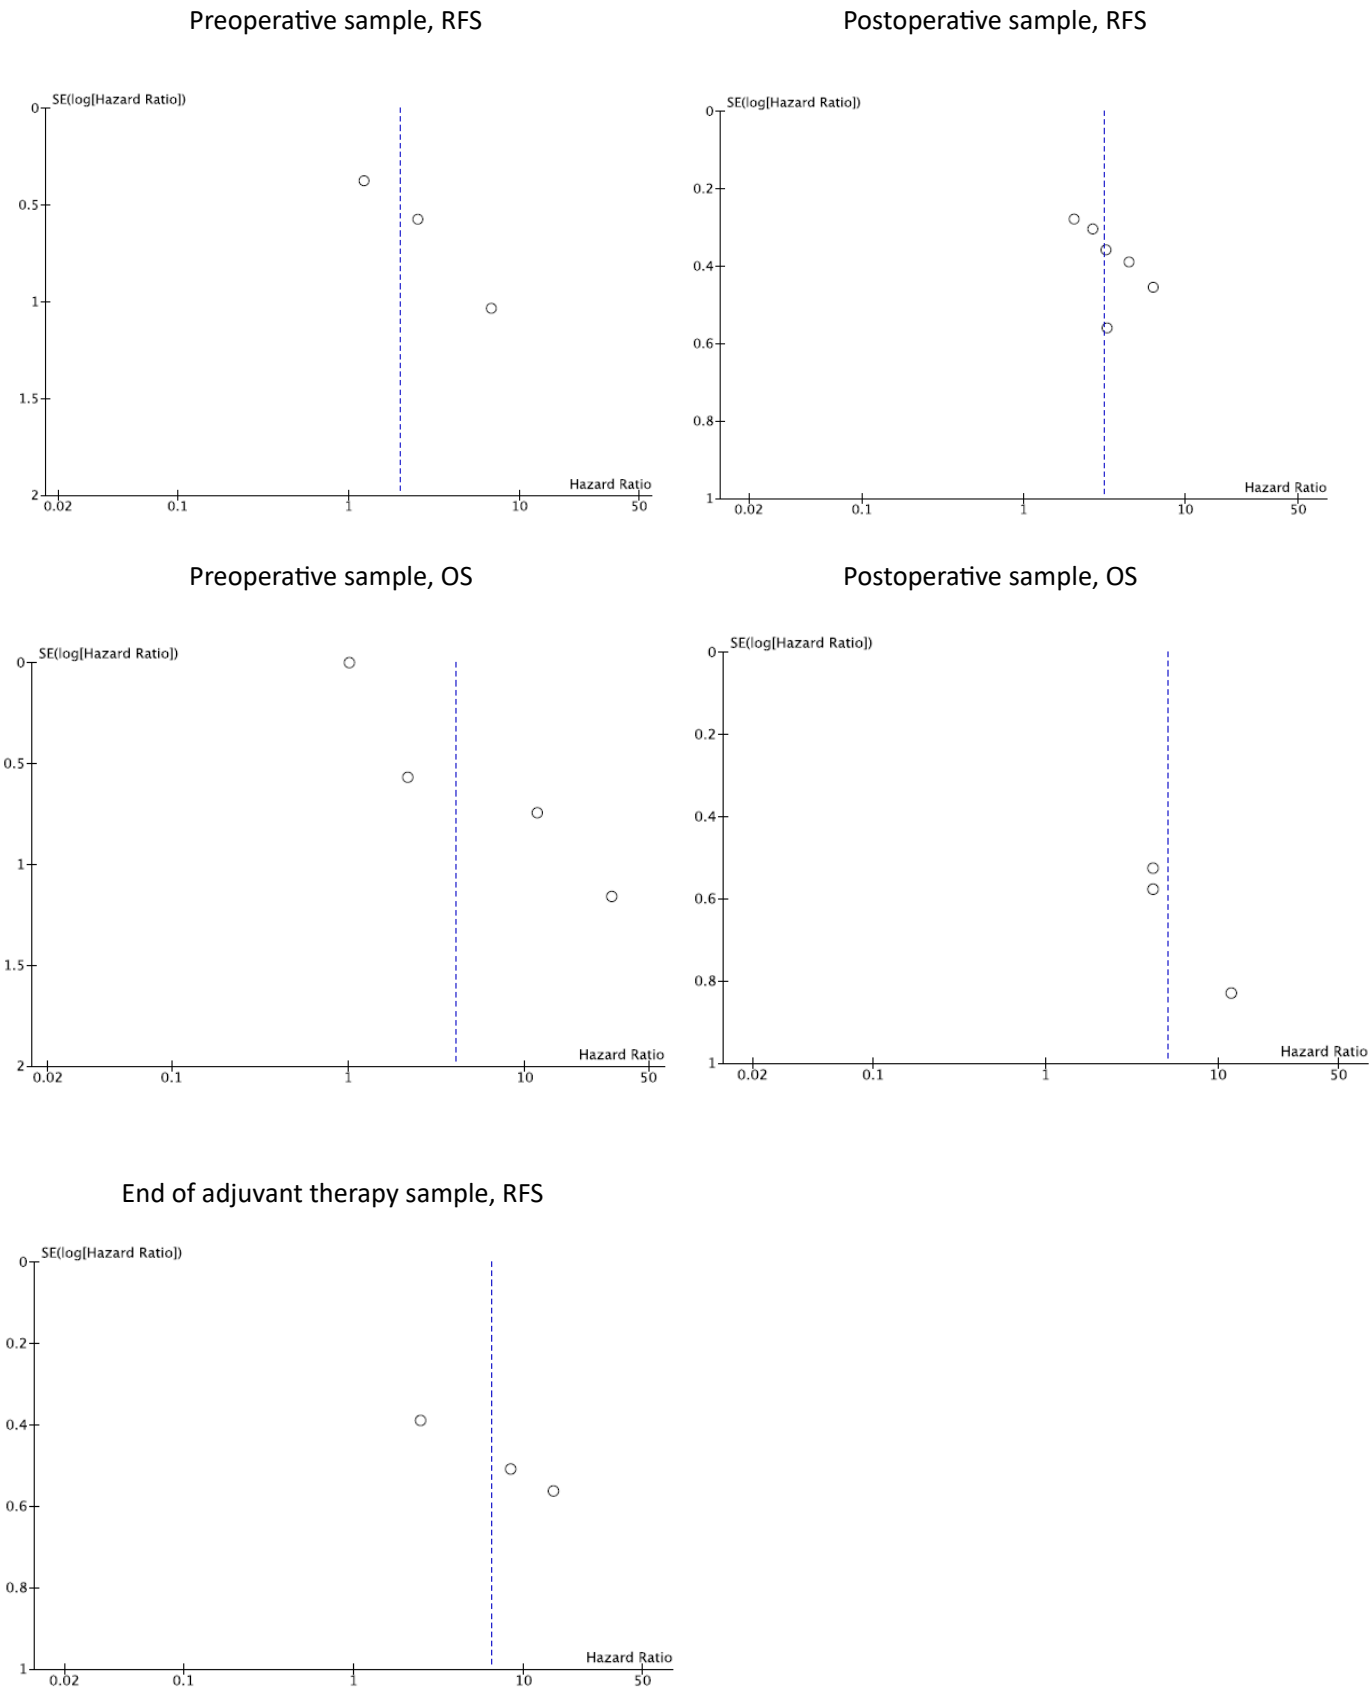

Supplement: s1 [file s1]
